# Supplementary material for: Scaling up pediatric nurse specialist education in Ghana – a longitudinal, mixed methods evaluation
Source: PubMed Central journal article supplement (PMC7885484; doi:10.1186/s12912-021-00550-1), 2021-02-16
Supplement: 12912_2021_550_MOESM2_ESM.pdf [file 12912_2021_550_MOESM2_ESM.pdf]

## Focus Group Questionnaire: 14-months follow-up

### 1. Opening question: How did the OSCE go?

*Probes:*

- a) *Which OSCE station did you think was the easiest/hardest?*
- b) *Why?* [You can ask them to raise their hands as you call out station names]

### 2. How would you describe your nursing role since completing the programme?

*Probes:*

- a) *Is it different? In what ways?*
- b) *Are you able to use the skills you acquired? Can you give us some examples?*
- c) *If you are not able to use your skills to the fullest extent, what is stopping you?*
- d) *Did you feel you were well received when you returned to your position?*

### 3) Have you been able to *transfer some of your knowledge to your peers?*

*Probes:*

- a) *Can you give us examples?*
- b) *How was this knowledge sharing received?*

### 4. Compared to before you took this programme, has your satisfaction level with your nursing role changed?

*Probes:*

- a) *Tell us why?*

### 5) What were the most valuable parts of the programme to you, and what do you wish you had learned more about/what do you think was missing?

**Thank you so much for taking the time to talk to us!**
